# Supplementary material for: Portable Wireless Intelligent Electrochemical Sensor for the Ultrasensitive Detection of Rutin Using Functionalized Black Phosphorene Nanocomposite
Source: MDPI journal article supplement (doi:10.3390/molecules27196603), 2022-10-05
Supplement: s1 [file s1]

## Supplementary Information

### Contents:

**Figure S1.** Oxidation peak currents ( $I_{pa}$ , red) and  $I_{pa}/I_{pc}$  ratio (blue) on different electrodes for 20.0  $\mu\text{mol L}^{-1}$  rutin (scan rate: 0.1  $\text{V s}^{-1}$ ).

**Figure S2.** (a) Plots of  $I - v$ , and (b) plots of  $E - \ln v$  of 20.0  $\mu\text{mol L}^{-1}$  rutin on NF/AuNPs/N-CPDs@FLBP/CILE at different scan rate (0.03, 0.05, 0.08, 0.1, 0.2, 0.3, 0.4, 0.5, 0.6, 0.7 and 0.8  $\text{V s}^{-1}$ ).

**Figure S3.** The oxidation peak current of (a) repeatability and (b) reproducibility for detection of 10.0  $\mu\text{mol L}^{-1}$  rutin.

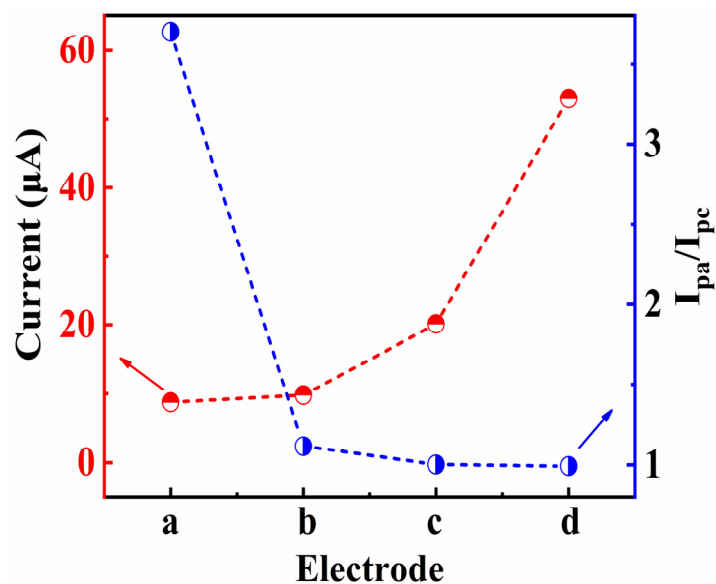

**Figure S1.** Oxidation peak currents ( $I_{pa}$ , red) and  $I_{pa}/I_{pc}$  ratio (blue) on different electrodes for 20.0  $\mu\text{mol L}^{-1}$  rutin (scan rate: 0.1  $\text{V s}^{-1}$ ).

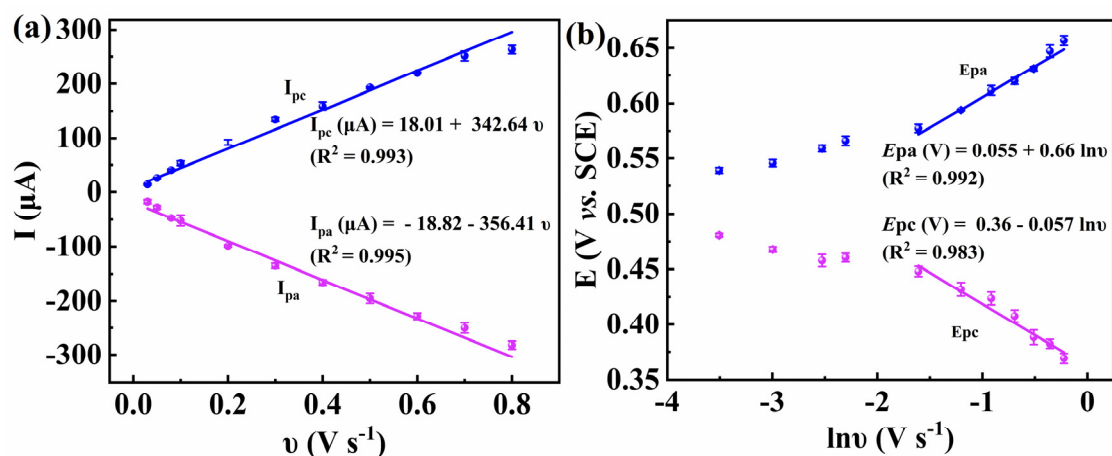

**Figure S2.** (a) Plots of  $I - v$ , and (b) plots of  $E - \ln v$  of  $20.0 \mu\text{mol L}^{-1}$  rutin on NF/AuNPs/N-CPDs@FLBP/CILE at different scan rate ( $0.03, 0.05, 0.08, 0.1, 0.2, 0.3, 0.4, 0.5, 0.6, 0.7$  and  $0.8 \text{ V s}^{-1}$ ).

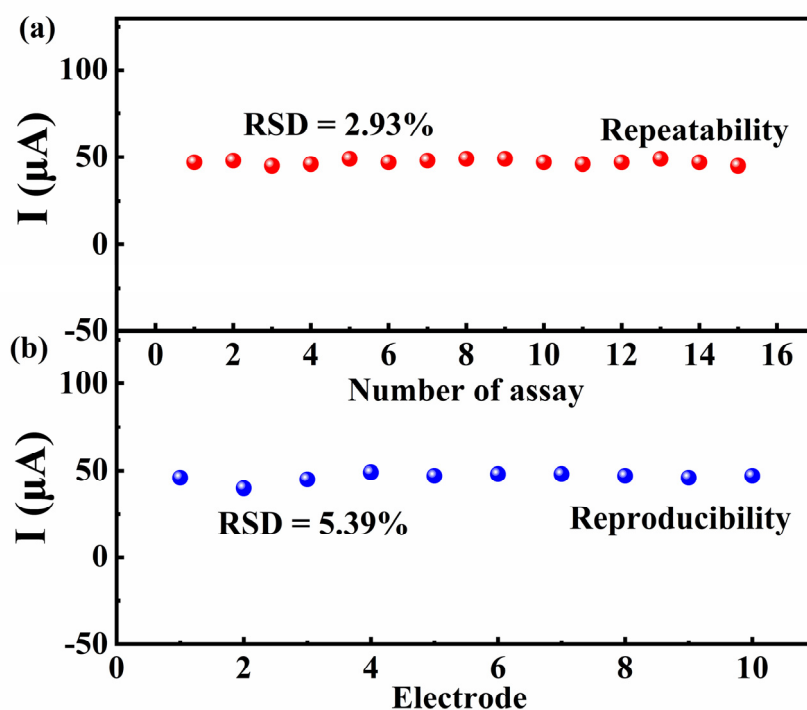

**Figure S3.** The oxidation peak current of (a) repeatability and (b) reproducibility for detection of  $10.0 \mu\text{mol L}^{-1}$  rutin.
